# Supplementary material for: csi2p modulates microtubule dynamics and organizes the bipolar spindle for chromosome segregation
Source: PubMed Central journal article supplement — Mol Biol Cell. 2014 Dec 1;25(24):3900–8. doi: 10.1091/mbc.E14-09-1370 (PMC4244199; doi:10.1091/mbc.e14-09-1370), 2014-12-01

# Supplemental Materials

*Molecular Biology of the Cell*

Costa et al.

## **Supplemental**

### **csi2p modulates microtubule dynamics and organizes the bipolar spindle for chromosome segregation.**

Judite Costa <sup>1,2</sup>, Chuanhai Fu <sup>3</sup>, V. Mohini Khare <sup>1</sup>, Phong T. Tran <sup>1,2</sup>

<sup>1</sup> Department of Cell & Developmental Biology, University of Pennsylvania, Philadelphia PA 19104 USA

<sup>2</sup> Institut Curie, UMR 144 CNRS, Paris 75005 France

<sup>3</sup> Department of Biochemistry, University of Hong Kong, Pokfulam, Hong Kong

Correspondence: tranp@mail.med.upenn.edu

#### ***Content:***

Figure Legends

Figure S1, S2, S3, S4

Table S1

## Figure Legends

### Figure S1.

**A.** Colony growth in the presence of the microtubule-depolymerizing drug MBC. *csi2Δ* cells are more sensitive to MBC than wildtype cells, indicating defects in the microtubule cytoskeleton.

**B.** Time-lapse images of a mitotic *csi1Δ* cell expressing mCherry-atb2p (tubulin). The *csi1Δ* cell shows transient microtubule protrusions indicating monopolar spindle phenotype (time=1-9 min), and delayed bipolar spindle formation (time = 10 min). Scale bar, 5μm.

**C.** Box and dot plot comparison of kinesin-5 cut7p spindle recruitment at mitosis onset in wildtype and *csi2Δ* cells. cut7p organizes spindle bipolarity (Hagan and Yanagida, 1992), and shows similar spindle recruitment time for both wildtype and *csi2Δ* cells, - 3.8±1.2 min (n=23) WT versus -3.6±2.2 min (n=16) *csi2Δ* (p=0.67), suggesting that the *csi2Δ* phenotype is not due to the improper recruitment of cut7p.

**D.** Box and dot plot comparison of bipolar spindle formation time subsequent to kinesin-5 cut7p recruitment. Wildtype cells establish spindle bipolarity 5.1±1.4 min (n=32) after cut7p recruitment. In contrast, *csi2Δ* cells take 7.4±2.0 min (n=15) ( $p < 10^{-3}$ ).

### Figure S2.

**A.** Time-lapse images showing centromere segregation in wildtype and *csi2Δ* cells expressing mCherry-atb2p and CEN1-GFP (centromere marker on chromosome 1). At anaphase B, when the spindle exhibits a dramatic increase in length, the wildtype centromeres are completely segregated to opposite spindle poles. In contrast, there is a lagging centromere (yellow arrow head) in the *csi2Δ* cell. Bar, 5μm.

**B.** Box and dot plot comparison of the duration of prophase-metaphase for wildtype and *csi2Δ* cells. Wildtype prophase-metaphase duration is 16.7 ± 3.0min (n=19), similar to 19.1±4.6min (n=20) for *csi2Δ* (p=0.06).

**C.** Spot assay of cell survival. Single deletion *csi2Δ*, *mad2Δ*, *bub3Δ* and *mph1Δ* grow similarly as wildtype under all temperatures tested. The double-deletion *csi2Δmad2Δ*, *csi2Δbub3Δ* and *csi2Δmph1Δ* exhibit increasing temperature sensitivity and are dead at 37°C, suggesting that the SAC helps ensure proper kinetochore-microtubule attachment in the absence of *csi2p*.

**Figure S3.**

**A.** Images of wildtype cells expressing *csi2*-GFP and *sid4*-mRFP (an SPB marker). *csi2*p localizes with *sid4*p at the SPB. Scale bar, 5 $\mu$ m.

**B.** Bar plot comparison of spindle structure in wildtype, *csi1* $\Delta$ , *csi2* $\Delta$ , and double-deletion *csi1* $\Delta$ *csi2* $\Delta$  cells expressing mCherry-*atb2*p. Compared to *csi2* $\Delta$ , *csi1* $\Delta$  cells showed a much higher frequency of transient monopolar spindles. The double-deletion *csi1* $\Delta$ *csi2* $\Delta$  showed similar frequency of monopolar spindles as *csi1* $\Delta$ , suggesting that *csi1*p is dominant over *csi2*p.

**Figure S4.**

**A.** Images of monopolar spindles of *cut7.24*<sup>ts</sup> (control) and *cut7.24*<sup>ts</sup>*csi2* $\Delta$  cells expressing mCherry-*atb2*p. Bottom panels show enlargements of the spindles from the top panels. Yellow dashed lines outline the spindle and microtubule contour, used to measure spindle area and microtubule intensity. Scale bar, 1 $\mu$ m.

**B.** Box and dot plot comparison of control and *csi2* $\Delta$  monopolar spindle size. Control cells have spindle size of 158 $\pm$ 22 sq. pixel (n=24). In contrast, *csi2* $\Delta$  cells have spindle size of 114 $\pm$ 39 sq. pixel (n=16), or 28% smaller than control (p<10<sup>-3</sup>).

**C.** Box and dot plot comparison of control and *csi2* $\Delta$  spindle microtubule intensity (arbitrary unit). Control cells have microtubule intensity of 2951 $\pm$ 615 a.u. (n=24). In contrast, *csi2* $\Delta$  cells have microtubule intensity of 2009 $\pm$  526 a.u. (n=16), or 32% less than control (p<10<sup>-3</sup>).

**Table S1. List of Strains**

| <b>Strains</b> | <b>Genotype</b>                                                                |
|----------------|--------------------------------------------------------------------------------|
| Figure 1       |                                                                                |
| PT.1939        | mCherry-atb2:HygR leu1-32 ura4-D18 h-                                          |
| PT.2469        | csi2Δ:NatR mCherry-atb2:HygR leu1-32 ura4-D18 h-                               |
| PT.2667        | mCherry-atb2:HygR alp4-GFP:KanR leu1-32 ura4-D18 h?                            |
| PT.2671        | csi2Δ:NatR mCherry-atb2:HygR alp4-GFP:KanR leu1-32 ura4-D18 h?                 |
| PT.2973        | cut7-3GFP:KanR mCherry-atb2:HygR leu1-32 ura4-D18 h-                           |
| PT.2975        | csi2Δ:NatR cut7-3GFP:KanR mCherry-atb2:HygR leu1-32 ura4-D18 h-                |
| Figure 2       |                                                                                |
| PT.2482        | cdc13-GFP:KanR mCherry-atb2:HygR leu1-32 ura4-D18 h+                           |
| PT.2483        | csi2Δ:NatR cdc13-GFP:KanR mCherry-atb2:HygR leu1-32 ura4-D18 h+                |
| PT.2489        | mini chromosome (ch16; ade6-210; his2) ade6-210 leu1-32 ura4-D18 h+            |
| PT.2490        | csi2Δ:NatR mini chromosome (ch16; ade6-210; his2) ade6-210 leu1-32 ura4-D18 h- |
| PT.2513        | mis12-GFP:Leu2 mCherry-atb2:HygR h+                                            |
| PT.2480        | csi2Δ:NatR mis12-GFP:Leu2 mCherry-atb2:HygR h-                                 |
| Figure 3       |                                                                                |
| PT.2505        | csi2-GFP:NatR mCherry-atb2:HygR leu1-32 ura4-D18 h-                            |
| PT.3113        | sad1-YFP:KanR csi2-mCherry:NatR ade6-210 leu1-32 ura4-D18 h?                   |
| PT.2432        | csi2-mCherry:NatR ade6-210 leu1-32 ura4-D18 h-                                 |
| PT.2673"       | csi2-mCherry:NatR sat1.1ts ade6-210 leu1-32 ura4-D18 h?                        |
| PT.2649        | csi2Δ:NatR sad1-YFP:KanR ade6-210 leu1-32 ura4-D18 h-                          |
| PT.2688        | csi2-GFP:NatR csi1Δ:KanR mCherry-atb2:HygR ura4-D18 h?                         |
| CF.671         | csi1-GFP:KanR mCherry-atb2:HygR leu1-32 ura4-D18 h-                            |
| PT.2687        | csi2Δ:NatR csi1-GFP:KanR mCherry-atb2:HygR leu1-32 ura4-D18 h?                 |
| PT.2513        | mis12-GFP:Leu2 mCherry-atb2:HygR h+                                            |
| CF.682         | csi1Δ:KanR mis12-GFP:Leu2 mCherry-atb2:HygR ura4-D18 h-                        |
| PT.2480        | csi2Δ:NatR mis12-GFP:Leu2 mCherry-atb2:HygR h-                                 |
| Figure 4       |                                                                                |
| PT.2480        | csi2Δ:NatR mis12-GFP:Leu2 mCherry-atb2:HygR h-                                 |
| PT.3182        | cdc13-GFP:KanR mis6-2mRFP-HygR h-                                              |
| PT.3186        | csi2Δ:NatR cdc13-GFP:KanR mis6-2mRFP-HygR h-                                   |
| Figure 5       |                                                                                |
| CF.341         | cut7.24ts mCherry-atb2:HygR leu1-32 ura4-D18 h+                                |
| PT.3134        | csi2Δ:NatR cut7.24ts mCherry-atb2:HygR leu1-32 ura4-D18 h-                     |
| PT.3138        | cut7.24ts mis12-GFP:Leu2 mCherry-atb2:HygR h-                                  |
| PT.3141        | csi2Δ:NatR cut7.24ts mis12-GFP:Leu2 mCherry-atb2:HygR h+                       |
| Figure S1      |                                                                                |
| CF.684         | csi1Δ:KanR mCherry-atb2:HygR leu1-32 ura4-D18 h+                               |
| PT.2973        | cut7-3GFP:KanR mCherry-atb2:HygR leu1-32 ura4-D18 h-                           |
| PT.2975        | csi2Δ:NatR cut7-3GFP:KanR mCherry-atb2:HygR leu1-32 ura4-D18 h-                |
| PT.286         | wildtype ade6-210 leu1-32 ura4-D18 h-                                          |
| PT.2400        | csi2Δ:NatR ade6-210 leu1-32 ura4-D18 h-                                        |

Figure S2

PT.2482 cdc13-GFP:KanR mCherry-atb2:HygR leu1-32 ura4-D18 h+  
PT.2483 csi2Δ:NatR cdc13-GFP:KanR mCherry-atb2:HygR leu1-32 ura4-D18 h+  
CF.441 his7+::LacI-GFP lys1+LacO mCherry-atb2:HygR leu1-32 ura4-D18 h+  
PT.2696 csi2Δ:NatR his7+::LacI-GFP lys1+LacO mCherry-atb2:HygR leu1-32 ura4-D18 h+  
PT.286 ade6-210 leu1-32 ura4-D18 h-  
PT.2400 csi2Δ:NatR ade6-210 leu1-32 ura4-D18 h-  
PT.3006 mad2Δ:KanR ade6-210 leu1-32 ura4-D18 h+  
PT.3005 bub3Δ:KanR ade6-210 leu1-32 ura4-D18 h+  
PT.3004 mph1Δ:KanR ade6-210 leu1-32 ura4-D18 h+  
PT.2513 mis12-GFP:Leu2 mCherry-atb2:HygR h+  
PT.2481 csi2Δ:NatR mis12-GFP:Leu2 mCherry-atb2:HygR h+  
PT.3016 mad2Δ:KanR csi2Δ:NatR mis12-GFP:Leu2 mCherry-atb2:HygR h-  
PT.3014 bub3Δ:KanR csi2Δ:NatR mis12-GFP:Leu2 mCherry-atb2:HygR h-  
PT.3012 mph1Δ:KanR csi2Δ:NatR mis12-GFP:Leu2 mCherry-atb2:HygR h-

Figure S3

PT.2646 csi2-GFP:NatR sid4-mRFP::ura leu1-32 h?  
CF.684 csi1Δ:KanR mCherry-atb2:HygR leu1-32 ura4-D18 h+  
PT.1939 mCherry-atb2:HygR leu1-32 ura4-D18 h-  
PT.2469 csi2Δ:NatR mCherry-atb2:HygR leu1-32 ura4-D18 h-  
PT.2684 csi1Δ:KanR csi2Δ:NatR mCherry-atb2:HygR leu1-32 ura4-D18 h?

Figure S4

CF.341 cut7.24ts mCherry-atb2:HygR leu1-32 ura4-D18 h+  
PT.3134 csi2Δ:NatR cut7.24ts mCherry-atb2:HygR leu1-32 ura4-D18 h-  
PT.3138 cut7.24ts mis12-GFP:Leu2 mCherry-atb2:HygR h-  
PT.3141 csi2Δ:NatR cut7.24ts mis12-GFP:Leu2 mCherry-atb2:HygR h+

Figure S1, Costa et al

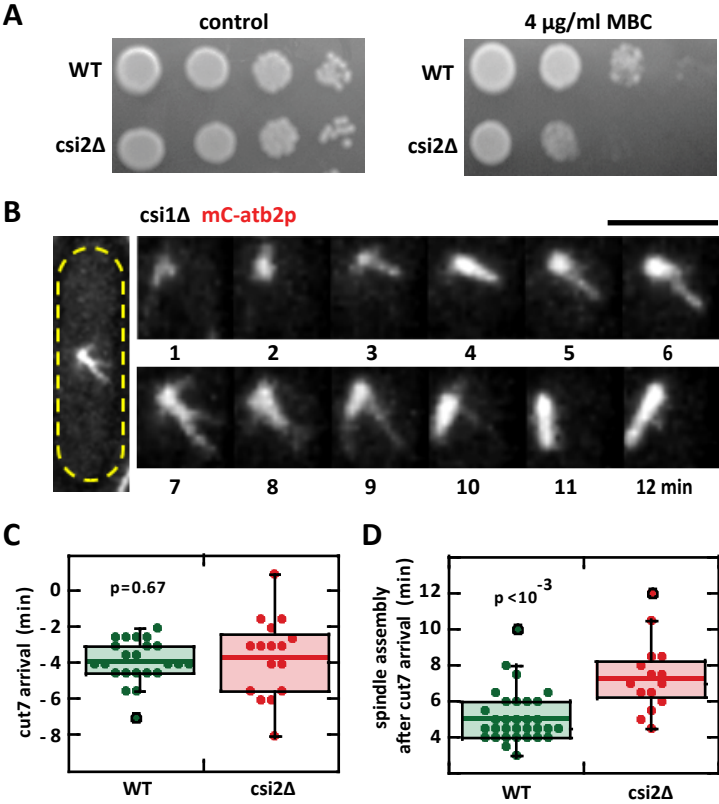

Figure S2, Costa et al

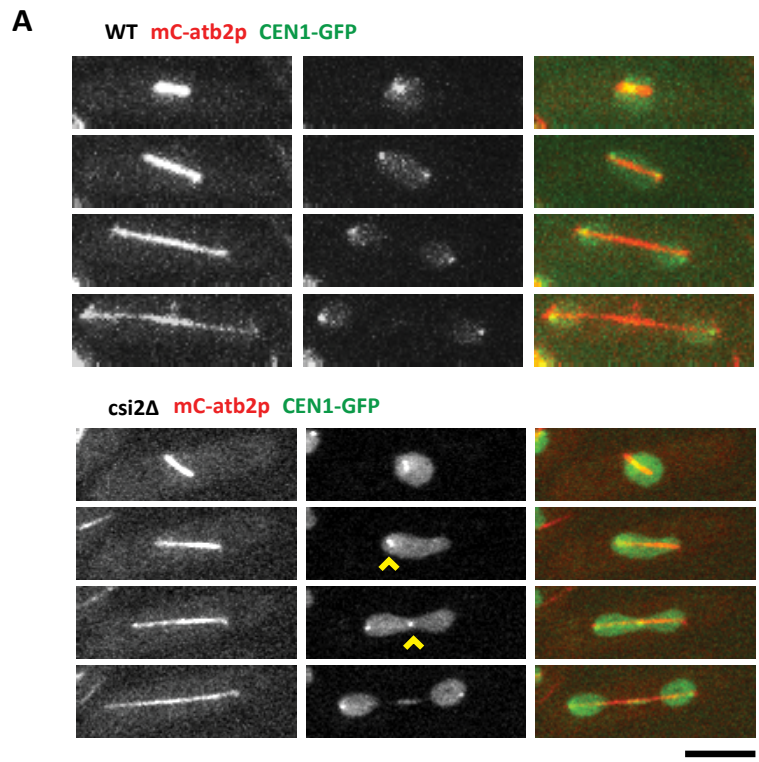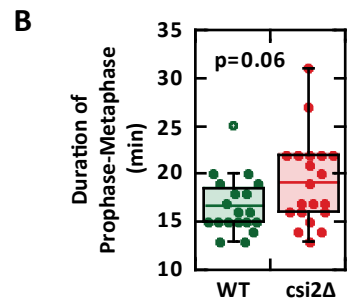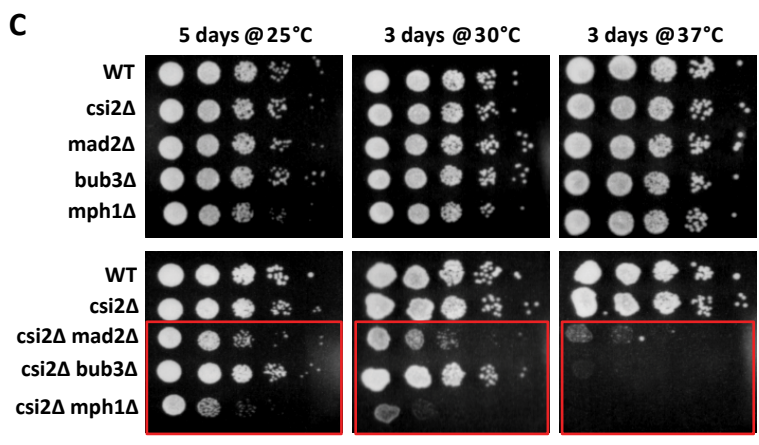



Figure S3, Costa et al

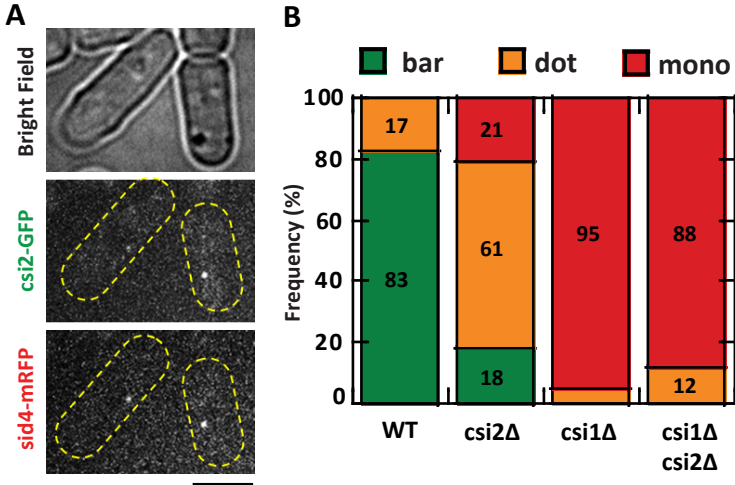

Figure S4, Costa et al

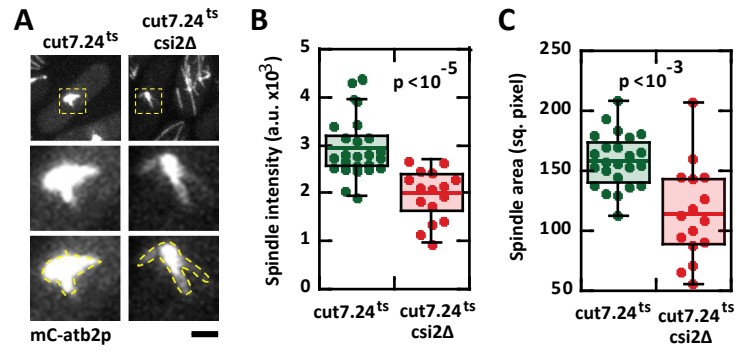

Supplement: supp_E14-09-1370v1_CombinedSupMats.pdf [file supp_E14-09-1370v1_CombinedSupMats.pdf]
